# Supplementary material for: Early deafness leads to re-shaping of functional connectivity beyond the auditory cortex
Source: PubMed Central journal article supplement (PMC8286229; doi:10.1007/s11682-020-00346-y), 2020-07-23
Supplement: 11682_2020_346_MOESM1_ESM.pdf [file 11682_2020_346_MOESM1_ESM.pdf]

## Early deafness leads to re-shaping of functional connectivity beyond the auditory cortex

Kamil Bonna<sup>1,2\*</sup>, Karolina Finc<sup>1\*</sup>, Maria Zimmermann<sup>3</sup>, Łukasz Bola<sup>3</sup>, Maciej Szul<sup>3</sup>, Piotr Mostowski<sup>4</sup>, Paweł Rutkowski<sup>4</sup>, Włodzisław Duch<sup>1,2</sup>, Artur Marchewka<sup>5</sup>, Katarzyna Jednoróg<sup>6</sup>, Marcin Szwed<sup>3</sup>

<sup>1</sup>Centre for Modern Interdisciplinary Technologies, Nicolaus Copernicus University, Toruń, Poland

<sup>2</sup>Institute of Physics, Faculty of Physics, Astronomy and Informatics, Nicolaus Copernicus University, Grudziądzka 5, 87-100 Torun, Poland

<sup>3</sup>Department of Psychology, Jagiellonian University, Ingardena 6, 30-060, Kraków, Poland

<sup>4</sup>Section for Sign Linguistics, Faculty of Polish Studies, University of Warsaw, ul. Krakowskie Przedmieście 26/28, 00-927 Warsaw, Poland,

<sup>5</sup>Laboratory of Brain Imaging, Neurobiology Center, Nencki Institute of Experimental Biology, Polish Academy of Sciences, Pasteur 3, 02-093 Warsaw, Poland

<sup>6</sup>Laboratory of Psychophysiology, Nencki Institute of Experimental Biology, Polish Academy of Sciences, Pasteur 3, 02-093 Warsaw, Poland

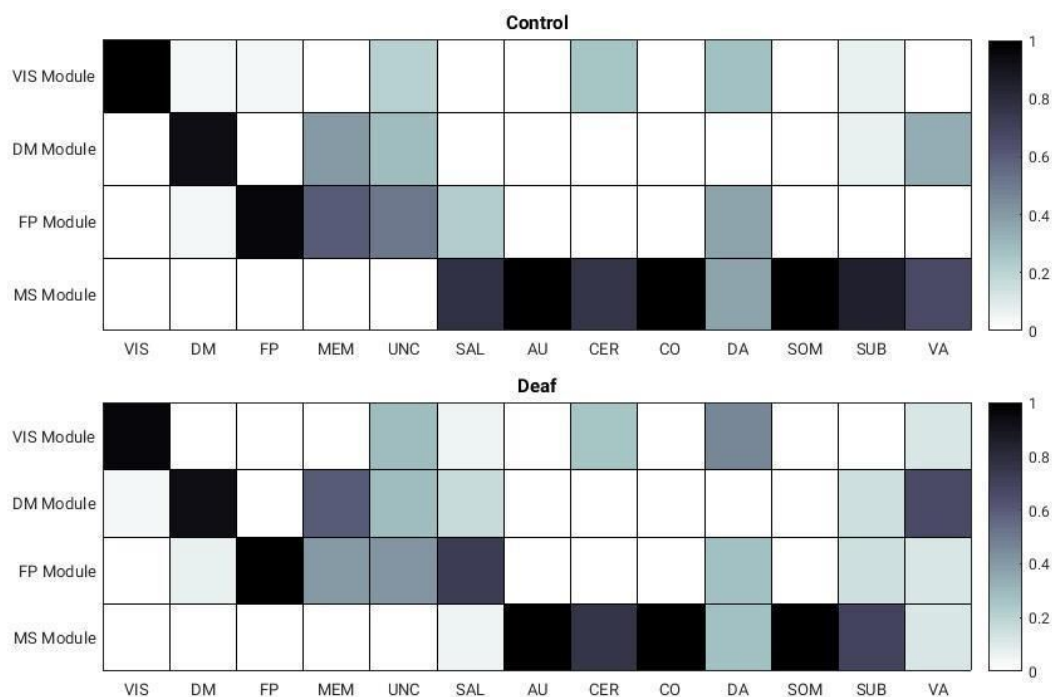

**Figure S1.** Overlap between data-driven representative network modules in hearing and deaf participants and 13 well-known large scale networks (LSNs) (Power et al., 2011). Vertical axis corresponds to four large-scale functional modules discovered by community detection algorithm (see Results). Horizontal axis corresponds to LSNs from Power et al. (2011). Darker colors reflect higher overlap coefficient between pair of modules.
